# Supplementary material for: Pemanfaatan Tepung Tempe untuk Memperpanjang Masa Simpan dan Mencegah Kerusakan Komponen Gizi Ikan Kembung Segar
Source: MDPI journal article supplement (doi:10.3390/microorganisms11112779), 1993-01-01
Supplement: s1 [file s1]

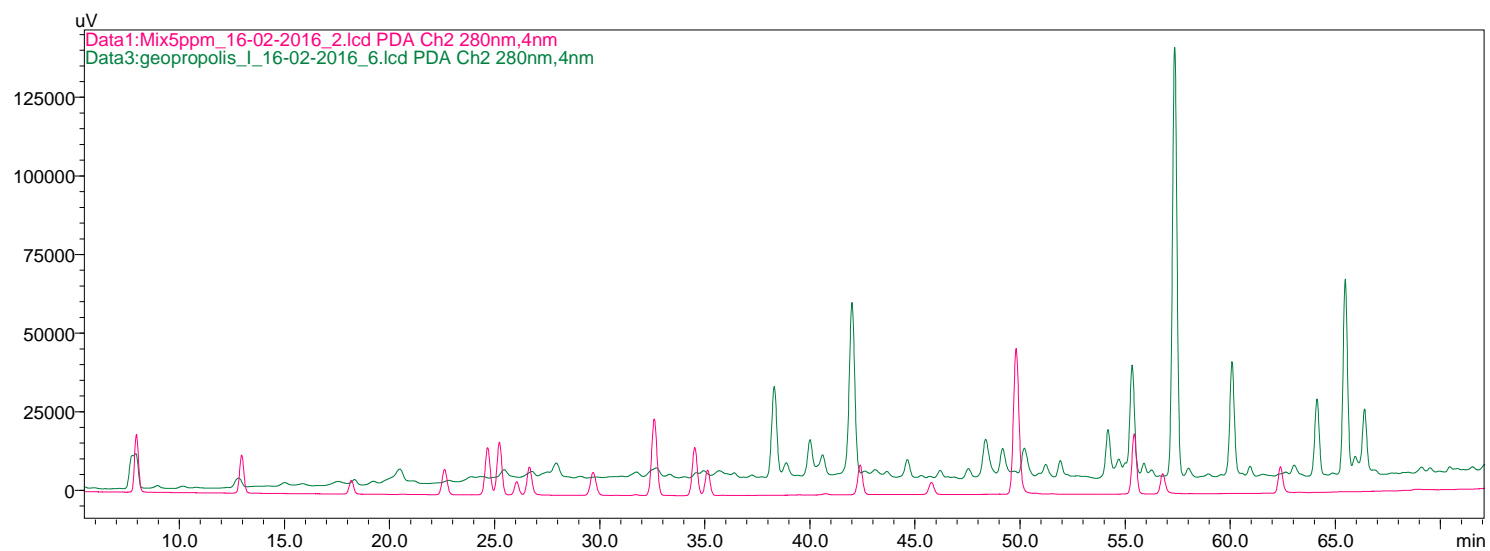

**Figure S1.** HPLC chromatogram obtained for the rainy geopropolis propolis sample at 280 nm.

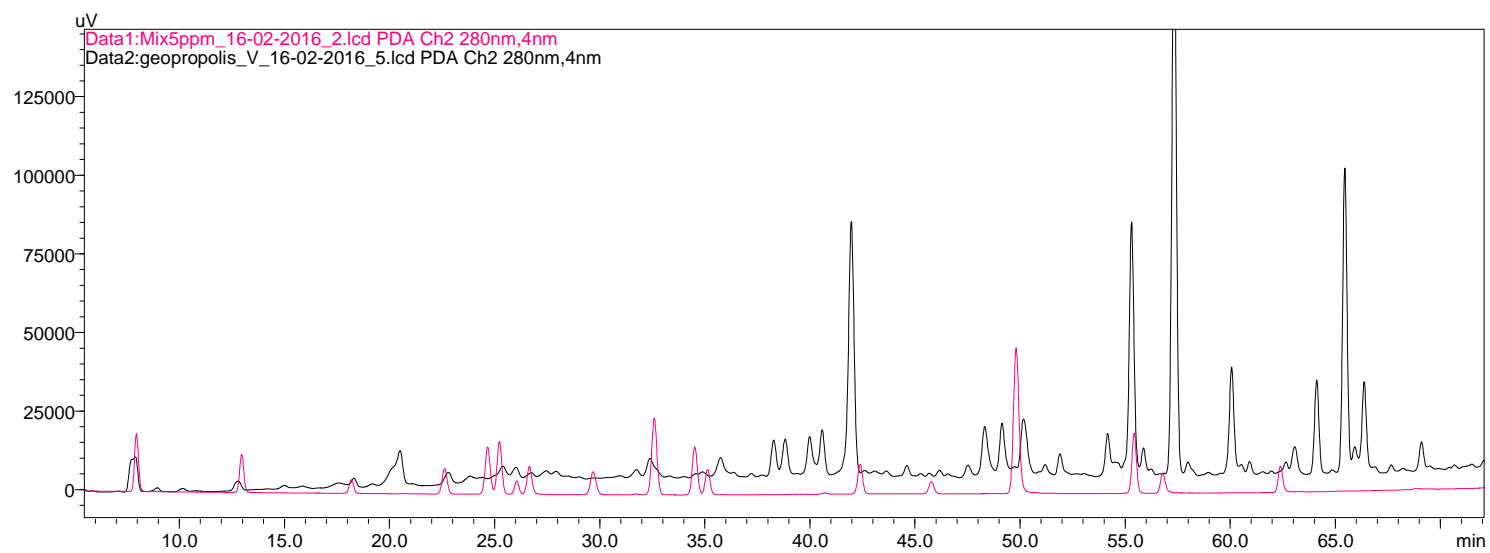

**Figure S2.** HPLC chromatogram obtained for the dry geopropolis sample at 280 nm.

**Table S1.** Phenolic compounds analysed by HPLC.

| Compound                | Retention time (min) | Dry geopropolis (mg/L) | Rainy geopropolis (mg/L) |
|-------------------------|----------------------|------------------------|--------------------------|
| gallic acid             | 7,137                | 5.84                   | 5.82                     |
| protocatechuic acid     | 12,743               | 2.46                   | 2.53                     |
| catechin                | 18,297               | 2.64                   | 8.39                     |
| vanillic acid           | 22,788               | ND                     | 2.43                     |
| caffeic acid            | 24,395               | ND                     | ND                       |
| epicatechin             | 25,376               | 1.32                   | 1.72                     |
| <i>p</i> -coumaric acid | 31,481               | <LOD                   | <LOQ                     |
| ferulic acid            | 34,376               | ND                     | ND                       |
| naringin                | 42,166               | 29.87                  | 45.39                    |
| Rutin                   | 45,556               | ND                     | ND                       |
| cinnamic acid           | 49,709               | <LOD                   | 2.54                     |
| Naringenin              | 55,251               | <LOQ                   | 2.11                     |
| quercetin               | 54,071               | ND                     | ND                       |

ND – not detected.
